# Supplementary material
Source: HighWire-hosted journal article supplement (https://openres.ersjournals.com/content/5/1/00175-2018)
Supplement: inline-supplementary-material-1 [file inline-supplementary-material-1.pdf]

## SUPPLEMENTAL INFORMATION

### Supplementary Tables

#### Tables

**S1 Table. Changes in the FEV<sub>1</sub> and FVC before and after Bronchodilator Use at Tie-COPD\***

**S2 Table. Annual decline in the FEV<sub>1</sub> and FVC before and after Bronchodilator Use at Tie-COPD\***

**S3 Table. Summary of Acute Exacerbations of COPD at Tie-COPD\***

**S4 Table. Changes in the CAT scores at both Tie-COPD and Follow-up \***

**S5 Table. Changes in the CCQ scores at both Tie-COPD and Follow-up \***

**S6 Table. Changes in the mMRC scores both Tie-COPD and Follow-up \***

**S1 Table. Changes in the FEV<sub>1</sub> and FVC before and after Bronchodilator Use at Tie-COPD\***

| Variable                  | Placebo Group<br>(N =126) | Tiotropium Group<br>(N = 136) | Difference (95% CI) † | P Value |
|---------------------------|---------------------------|-------------------------------|-----------------------|---------|
| FEV <sub>1</sub> (L)      |                           |                               |                       |         |
| Before bronchodilator use |                           |                               |                       |         |
| Baseline                  | 1.88±0.05                 | 1.97±0.05                     | 0.09 (-0.05 to 0.22)  | 0.22    |
| Month 1                   | 1.90±0.02                 | 2.03±0.02                     | 0.13 (0.08 to 0.18)   | <0.0001 |
| Month 6                   | 1.85±0.02                 | 2.05±0.02                     | 0.20 (0.15 to 0.25)   | <0.0001 |
| Month12                   | 1.86±0.02                 | 2.02±0.02                     | 0.16 (0.11 to 0.22)   | <0.0001 |
| Month18                   | 1.84±0.02                 | 2.01±0.02                     | 0.17 (0.11 to 0.23)   | <0.0001 |
| Month 24                  | 1.80±0.02                 | 1.99±0.02                     | 0.19 (0.13 to 0.25)   | <0.0001 |
| After bronchodilator use  |                           |                               |                       |         |
| Baseline                  | 2.00±0.05                 | 2.11±0.04                     | 0.11 (-0.02 to 0.24)  | 0.11    |
| Month 1                   | 2.03±0.02                 | 2.10±0.02                     | 0.08 (0.03 to 0.12)   | 0.0009  |
| Month 6                   | 2.00±0.02                 | 2.11±0.02                     | 0.11 (0.07 to 0.16)   | <0.0001 |
| Month12                   | 1.99±0.02                 | 2.08±0.02                     | 0.10 (0.05 to 0.14)   | <0.0001 |
| Month18                   | 1.97±0.02                 | 2.08±0.02                     | 0.12 (0.06 to 0.17)   | 0.0002  |
| Month 24                  | 1.95±0.02                 | 2.07±0.02                     | 0.12 (0.06 to 0.17)   | <0.0001 |
| FVC (L)                   |                           |                               |                       |         |
| Before bronchodilator use |                           |                               |                       |         |
| Baseline                  | 3.17±0.07                 | 3.27±0.06                     | 0.10 (-0.09 to 0.29)  | 0.29    |
| Month 1                   | 3.16±0.03                 | 3.26±0.03                     | 0.10 (0.02 to 0.18)   | 0.0129  |
| Month 6                   | 3.12±0.03                 | 3.29±0.03                     | 0.17 (0.08 to 0.25)   | 0.0002  |
| Month12                   | 3.13±0.03                 | 3.25±0.03                     | 0.12 (0.03 to 0.21)   | 0.0104  |
| Month18                   | 3.07±0.04                 | 3.25±0.04                     | 0.18 (0.09 to 0.28)   | 0.0002  |
| Month 24                  | 3.02±0.03                 | 3.21±0.03                     | 0.19 (0.10 to 0.28)   | <0.0001 |
| After bronchodilator use  |                           |                               |                       |         |
| Baseline                  | 3.26±0.07                 | 3.38±0.06                     | 0.12 (-0.06 to 0.30)  | 0.18    |
| Month 1                   | 3.26±0.03                 | 3.30±0.03                     | 0.04 (-0.03 to 0.11)  | 0.28    |
| Month 6                   | 3.24±0.03                 | 3.33±0.03                     | 0.09 (0.01 to 0.17)   | 0.0343  |
| Month12                   | 3.23±0.03                 | 3.28±0.03                     | 0.05 (-0.04 to 0.13)  | 0.26    |
| Month18                   | 3.21±0.03                 | 3.28±0.03                     | 0.07 (-0.02 to 0.16)  | 0.13    |
| Month 24                  | 3.15±0.03                 | 3.23±0.03                     | 0.08 (-0.01 to 0.16)  | 0.07    |

\*Data are shown as mean ± standard error. Values were measured from day 30 until the first month of tiotropium withdrawal (Tie-COPD study from 1 to 24 months). Multiple linear regression was adopted for each follow-up. For each follow-up visit, the measured value was the dependent variable, and covariates included the individual baseline value, baseline smoking status, treatment allocation, and participating center.

†The difference was calculated as the value in the tiotropium group minus the value in the placebo group.

**S2 Table. Annual decline in the FEV<sub>1</sub> and FVC before and after Bronchodilator Use at Tie-COPD\***

| Variable                  | Decline per Year           |                               |                       | P Value |
|---------------------------|----------------------------|-------------------------------|-----------------------|---------|
|                           | Placebo Group<br>(N = 126) | Tiotropium Group<br>(N = 136) | Difference (95% CI) † |         |
| FEV <sub>1</sub> (ml)     |                            |                               |                       |         |
| Before bronchodilator use | 48±8                       | 38±8                          | 10 (-11 to 32)        | 0.35    |
| After bronchodilator use  | 41±8                       | 35±8                          | 7 (-15 to 28)         | 0.54    |
| FVC (ml)                  |                            |                               |                       |         |
| Before bronchodilator use | 71±13                      | 47±13                         | 24 (-11 to 60)        | 0.18    |
| After bronchodilator use  | 54±13                      | 54±12                         | 0 (-34 to 34)         | 0.99    |

\*Data are shown as mean ± standard error per year. Values were measured from day 30 until the end of the Tie-COPD study (including 30 days after discontinuation of treatment). Multiple linear regression was adopted for each follow-up. For each follow-up visit, the measured value was the dependent variable, and covariates included the individual baseline value, baseline smoking status, treatment allocation, and participating center.

†The difference was calculated as the value in the placebo group minus the value in the tiotropium group.

**S3 Table. Summary of Acute Exacerbations of COPD at Tie-COPD\***

| <b>Variable</b>                        | <b>Placebo Group<br/>(N = 126)</b> | <b>Tiotropium Group<br/>(N = 136)</b> | <b>Relative Risk for<br/>Tiotropium vs. Placebo<br/>(95% CI)</b> | <b>P Value</b> |
|----------------------------------------|------------------------------------|---------------------------------------|------------------------------------------------------------------|----------------|
| No. of exacerbations per patient-year† |                                    |                                       |                                                                  |                |
| Total                                  | 0.13±0.02                          | 0.07±0.01                             | 0.57 (0.35 to 0.92)                                              | 0.0223         |
| Mild                                   | 0.03±0.01                          | 0.01±0.01                             | 0.52 (0.20 to 1.3)                                               | 0.18           |
| Moderate                               | 0.08±0.01                          | 0.05±0.01                             | 0.66 (0.39 to 1.09)                                              | 0.11           |
| Severe                                 | 0.02±0.01                          | 0.01±0.01                             | 0.28 (0.07 to 1.15)                                              | 0.08           |
| Of moderate or worse severity          | 0.10±0.02                          | 0.06±0.01                             | 0.58 (0.35 to 0.97)                                              | 0.0373         |

\*Data are shown as mean ± standard error. Exacerbation frequency per patient-year was defined as the number of exacerbations for a single patient per year.

†The relative risks in these categories were calculated with the use of Poisson regression corrected for treatment exposure and over-dispersion.

**S4 Table. Changes in the CAT scores at both Tie-COPD and Follow-up\***

|                     | <b>Placebo Group</b><br>(N = 126) | <b>Tiotropium Group</b><br>(N = 136) | <b>Difference</b><br><b>(Placebo-Tiotropium)</b><br><b>(95% CI) †</b> | <b>P Value</b> |
|---------------------|-----------------------------------|--------------------------------------|-----------------------------------------------------------------------|----------------|
| <b>At Tie-COPD</b>  |                                   |                                      |                                                                       |                |
| Baseline            | 3.95±0.29                         | 4.53±0.36                            | -0.58 (-1.50 to 0.35)                                                 | 0.22           |
| Month 1             | 3.91±0.25                         | 3.52±0.24                            | 0.38 (-0.28 to 1.05)                                                  | 0.26           |
| Month 3             | 3.62±0.21                         | 3.16±0.21                            | 0.46 (-0.12 to 1.03)                                                  | 0.12           |
| Month 6             | 3.88±0.24                         | 3.56±0.24                            | 0.32 (-0.33 to 0.97)                                                  | 0.33           |
| Month 9             | 3.65±0.27                         | 3.45±0.27                            | 0.19 (-0.54 to 0.93)                                                  | 0.61           |
| Month 12            | 3.50±0.25                         | 3.65±0.25                            | -0.15 (-0.83 to 0.53)                                                 | 0.66           |
| Month 15            | 3.87±0.26                         | 3.19±0.26                            | 0.68 (-0.03 to 1.39)                                                  | 0.06           |
| Month 18            | 4.20±0.24                         | 3.67±0.25                            | 0.53 (-0.13 to 1.19)                                                  | 0.11           |
| Month 21            | 4.66±0.30                         | 3.73±0.30                            | 0.94 (0.14 to 1.74)                                                   | 0.0222         |
| Month 24            | 4.73±0.28                         | 3.72±0.29                            | 1.01 (0.23 to 1.78)                                                   | 0.0109         |
| <b>At Follow-up</b> |                                   |                                      |                                                                       |                |
| Month 36            | 10.1±0.8                          | 7.8±0.8                              | 2.32 (0.53 to 4.12)                                                   | 0.0116         |
| Month 48            | 10.8±0.8                          | 9.5±0.8                              | 1.35 (-0.33 to 3.03)                                                  | 0.11           |
| Month 60            | 9.1±0.8                           | 9.2±0.8                              | -0.08 (-2.20 to 2.05)                                                 | 0.94           |

\*Data are shown as mean ± standard error. Multiple linear regression was adopted for each follow-up. At Tie-COPD, the measured value was the dependent variable, and covariates included the individual baseline value, baseline smoking status, treatment allocation, and participating center. Additionally, for 36 to 60 months, the P-value was computed by using the individual baseline value, smoking status across the whole follow-up, bronchiectasis status, treatment allocation.

†The difference was calculated as the value in the placebo group minus the value in the tiotropium group.

**S5 Table. Changes in the CCQ scores at both Tie-COPD and Follow-up\***

|                     | <b>Placebo Group</b><br>(N = 126) | <b>Tiotropium Group</b><br>(N = 136) | <b>Difference</b><br>(Placebo-Tiotropium)<br>(95% CI) † | <b>P Value</b> |
|---------------------|-----------------------------------|--------------------------------------|---------------------------------------------------------|----------------|
| <b>At Tie-COPD</b>  |                                   |                                      |                                                         |                |
| Baseline            | 6.55±0.47                         | 6.56±0.48                            | -0.01 (-1.34 to 1.32)                                   | 0.99           |
| Month 1             | 6.69±0.31                         | 5.90±0.30                            | 0.80 (-0.03 to 1.62)                                    | 0.06           |
| Month 3             | 6.17±0.29                         | 5.78±0.29                            | 0.39 (-0.39 to 1.18)                                    | 0.32           |
| Month 6             | 6.66±0.34                         | 5.78±0.34                            | 0.88 (-0.03 to 1.79)                                    | 0.06           |
| Month 9             | 6.52±0.34                         | 5.49±0.34                            | 1.02 (0.10 to 1.95)                                     | 0.0299         |
| Month 12            | 6.18±0.33                         | 6.20±0.33                            | -0.02 (-0.91 to 0.87)                                   | 0.97           |
| Month 15            | 7.28±0.34                         | 6.42±0.34                            | 0.86 (-0.06 to 1.77)                                    | 0.07           |
| Month 18            | 7.46±0.33                         | 6.07±0.34                            | 1.39 (0.48 to 2.29)                                     | 0.0029         |
| Month 21            | 8.06±0.38                         | 6.68±0.38                            | 1.38 (0.35 to 2.41)                                     | 0.0087         |
| Month 24            | 7.38±0.37                         | 5.96±0.38                            | 1.42 (0.40 to 2.43)                                     | 0.0063         |
| <b>At Follow-up</b> |                                   |                                      |                                                         |                |
| Month 36            | 11.7±0.8                          | 9.6±0.9                              | 2.04 (0.16 to 3.93)                                     | 0.0342         |
| Month 48            | 13.0±0.9                          | 12.5±0.9                             | 0.48 (-1.42 to 2.37)                                    | 0.62           |
| Month 60            | 12.5±1.1                          | 13.1±1.1                             | -0.65 (-3.43 to 2.12)                                   | 0.64           |

\*Data are shown as mean ± standard error. Multiple linear regression was adopted for each follow-up. At Tie-COPD, the measured value was the dependent variable, and covariates included the individual baseline value, baseline smoking status, treatment allocation, and participating center. Additionally, for 36 to 60 months, the P-value was computed by using the individual baseline value, smoking status across the whole follow-up, bronchiectasis status, treatment allocation.

†The difference was calculated as the value in the placebo group minus the value in the tiotropium group.

**S6 Table. Changes in the mMRC scores at both Tie-COPD and Follow-up\***

| Follow-up           | Placebo Group<br>(N=126) |           |           |         |         | Tiotropium Group<br>(N=136) |           |           |         |         | P Value |
|---------------------|--------------------------|-----------|-----------|---------|---------|-----------------------------|-----------|-----------|---------|---------|---------|
|                     | 0                        | 1         | 2         | 3       | 4       | 0                           | 1         | 2         | 3       | 4       |         |
| <b>At Tie-COPD</b>  |                          |           |           |         |         |                             |           |           |         |         |         |
| Baseline            | 62 (49.2)                | 52 (41.3) | 12 (9.5)  | 0 (0.0) | 0 (0.0) | 77 (56.6)                   | 50 (36.8) | 9 (6.6)   | 0 (0.0) | 0 (0.0) | 0.43    |
| Month 1             | 58 (46.0)                | 50 (39.7) | 8 (6.3)   | 1 (0.8) | 0 (0.0) | 73 (53.7)                   | 53 (39.0) | 5 (3.7)   | 0 (0.0) | 0 (0.0) | 0.44    |
| Month 3             | 64 (50.8)                | 56 (44.4) | 5 (4.0)   | 0 (0.0) | 0 (0.0) | 82 (60.3)                   | 47 (34.6) | 5 (3.7)   | 0 (0.0) | 0 (0.0) | 0.26    |
| Month 6             | 60 (47.6)                | 56 (44.4) | 8 (6.3)   | 0 (0.0) | 0 (0.0) | 88 (64.7)                   | 40 (29.4) | 4 (2.9)   | 0 (0.0) | 0 (0.0) | 0.0110  |
| Month 9             | 62 (49.2)                | 51 (40.5) | 11 (8.7)  | 0 (0.0) | 0 (0.0) | 79 (58.1)                   | 44 (32.4) | 6 (4.4)   | 0 (0.0) | 0 (0.0) | 0.14    |
| Month 12            | 49 (38.9)                | 64 (50.8) | 12 (9.5)  | 0 (0.0) | 0 (0.0) | 51 (37.5)                   | 66 (48.5) | 12 (8.8)  | 0 (0.0) | 0 (0.0) | 1.00    |
| Month 15            | 45 (35.7)                | 68 (54.0) | 11 (8.7)  | 0 (0.0) | 0 (0.0) | 65 (47.8)                   | 60 (44.1) | 5 (3.7)   | 0 (0.0) | 0 (0.0) | 0.0445  |
| Month 18            | 40 (31.7)                | 67 (53.2) | 17 (13.5) | 2 (1.6) | 0 (0.0) | 51 (37.5)                   | 69 (50.7) | 10 (7.4)  | 0 (0.0) | 0 (0.0) | 0.17    |
| Month 21            | 40 (31.7)                | 66 (52.4) | 17 (13.5) | 1 (0.8) | 0 (0.0) | 59 (43.4)                   | 59 (43.4) | 12 (8.8)  | 0 (0.0) | 0 (0.0) | 0.13    |
| Month 24            | 36 (28.6)                | 63 (50.0) | 24 (19.0) | 2 (1.6) | 0 (0.0) | 51 (37.5)                   | 57 (41.9) | 19 (14.0) | 1 (0.7) | 0 (0.0) | 0.29    |
| <b>At Follow-up</b> |                          |           |           |         |         |                             |           |           |         |         |         |
| Month 36            | 26 (20.6)                | 20 (15.9) | 11 (8.7)  | 0 (0.0) | 0 (0.0) | 35 (25.7)                   | 17 (12.5) | 9 (6.6)   | 2 (1.5) | 0 (0.0) | 0.33    |
| Month 48            | 34 (27.0)                | 32 (25.4) | 23 (18.3) | 4 (3.2) | 0 (0.0) | 37 (27.2)                   | 36 (26.5) | 24 (17.6) | 6 (4.4) | 1 (0.7) | 0.88    |
| Month 60            | 15 (11.9)                | 25 (19.8) | 9 (7.1)   | 2 (1.6) | 0 (0.0) | 15 (11.0)                   | 21 (15.4) | 13 (9.6)  | 1 (0.7) | 1 (0.7) | 0.67    |

\*Data are shown as n (%), and P-values were derived from the CMH test.
